# Supplementary material for: Driving Forces of Forest Expansion Dynamics across the Iberian Peninsula (1987–2017): A Spatio-Temporal Transect
Source: MDPI journal article supplement (doi:10.3390/f13030475), 2022-03-18
Supplement: s1 [file s1]

Archive with 1 entries (1 files):
- forests-1618229-supplementary.pdf
